# Supplementary material for: Clinical presentations leading to arrhythmogenic left ventricular cardiomyopathy
Source: PubMed Central journal article supplement — Open Heart. 2022 Apr 20;9(1):e001914. doi: 10.1136/openhrt-2021-001914 (PMC9021777; doi:10.1136/openhrt-2021-001914), 2022-04-20
Supplement: openhrt-2021-001914supp001.pdf [file openhrt-2021-001914supp001.pdf]

**Supplementary material: detailed relevant genetic findings.**

| Family | Patient | Diagnostic Pathway | CMP phenotype | Gene identified | Exon     | Nucleotide Change       | Protein change              | Mutation Type        | Mutation classification According to Varsome<br><a href="https://varsome.com/">https://varsome.com/</a> | Mutation Classification According to Clinvar<br><a href="https://www.ncbi.nlm.nih.gov/clinvar/">https://www.ncbi.nlm.nih.gov/clinvar/</a> |
|--------|---------|--------------------|---------------|-----------------|----------|-------------------------|-----------------------------|----------------------|---------------------------------------------------------------------------------------------------------|-------------------------------------------------------------------------------------------------------------------------------------------|
| I.     | 1       | Screening          | N             | DSP             | 10       | c.1209C>G               | p.Tyr403*                   | Nonsense             | Pathogenic (PVS1,PM2,PP3)                                                                               | Not reported                                                                                                                              |
| I.     | 2       | Screening          | N             | DSP             | 10       | c.1209C>G               | p.Tyr403*                   | Nonsense             | Pathogenic (PVS1,PM2,PP3)                                                                               | Not reported                                                                                                                              |
| I.     | 3       | Screening          | N             | DSP             | 10       | c.1209C>G               | p.Tyr403*                   | Nonsense             | Pathogenic (PVS1,PM2,PP3)                                                                               | Not reported                                                                                                                              |
| I.     | 4       | Screening          | HNDC          | DSP             | 10       | c.1209C>G               | p.Tyr403*                   | Nonsense             | Pathogenic (PVS1,PM2,PP3)                                                                               | Not reported                                                                                                                              |
| I.     | 5       | Screening          | N             | DSP             | 10       | c.1209C>G               | p.Tyr403*                   | Nonsense             | Pathogenic (PVS1,PM2,PP3)                                                                               | Not reported                                                                                                                              |
| II.    | 6       | Screening          | DCM           | SCN5A<br>ANK2   | 14<br>38 | c.2244G>A<br>c.10054G>C | p.Met748Ile<br>p.Val3352Leu | Missense<br>Missense | Likely Pathogenic (PM1, PM2,PP2,PP3)<br>Likely Benign (PM2,BP1,BP4)                                     | VUS<br>Not reported                                                                                                                       |
| II.    | 7       | Screening          | HNDC          | SCN5A<br>ANK2   | 14<br>38 | c.2244G>A<br>c.10054G>C | p.Met748Ile<br>p.Val3352Leu | Missense<br>Missense | Likely Pathogenic (PM1, PM2,PP2,PP3)<br>Likely Benign (PM2,BP1,BP4)                                     | VUS<br>Not reported                                                                                                                       |
| III.   | 8       | HF                 | DCM           | DSP             | 11       | c.1339C>T               | p.Gln447*                   | Nonsense             | Pathogenic (PVS1,PM2,PP3)                                                                               | Pathogenic                                                                                                                                |

|       |    |               |      |        |     |            |                     |            |                               |                              |
|-------|----|---------------|------|--------|-----|------------|---------------------|------------|-------------------------------|------------------------------|
| IV.   | 9  | Screening     | N    | DSP    | 23b | c.3533T>G  | p.Leu1178Arg        | Missense   | Likely Pathogenic (PM2,PP3)   | Not reported                 |
| IV.   | 10 | Sudden death  | N    | DSP    | 23b | c.3533T>G  | p.Leu1178Arg        | Missense   | Likely Pathogenic(PM2,PP3)    | Not reported                 |
|       |    |               |      | TMEM43 | 12  | c.1150C>G  | p. Leu384Val        | Missense   | Benign (BS1, BS2, BP1, BP4)   | VUS                          |
| V.    | 11 | Arrhythmic    | HNDC | DSP    | 20  | c.2821C>T  | p.Arg941*           | Nonsense   | Pathogenic (PVS1,PP5,PM2,PP3) | Pathogenic/Likely Pathogenic |
| V.    | 12 | Screening     | N    | DSP    | 20  | c.2821C>T  | p.Arg941*           | Nonsense   | Pathogenic (PVS1,PP5,PM2,PP3) | Pathogenic/Likely Pathogenic |
| VI.   | 13 | Chest pain    | N    | DSP    | 24  | c.6496C>T  | p.Arg2166*          | Nonsense   | Pathogenic                    | Pathogenic                   |
| VII.  | 14 | Arrhythmic    | N    | DSP    | 6   | c. 894G>A  | p.Trp298*           | Nonsense   | Pathogenic (PVS1,PM2,PP3)     | Pathogenic                   |
| VIII. | 15 | Heart failure | DCM  | DSP    | 23  | c.5342delG | p.Arg1781AsnfsTer12 | Frameshift | Pathogenic (PVS1,PM2,PP3)     | Not reported                 |
| VIII. | 16 | Screening     | N    | DSP    | 23  | c.5342delG | p.Arg1781AsnfsTer12 | Frameshift | Pathogenic (PVS1,PM2,PP3)     | Not reported                 |
| IX.   | 17 | Arrhythmic    | N    | PKP2   | 7   | c.1643delG | Gly548fs*562        | Frameshift | Pathogenic (PVS1,PP5,PM2)     | Pathogenic                   |
|       |    |               |      | TMEM43 | 12  | c.1112A>G  | p.Tyr371Cys         | Missense   | Likely Benign (PP3.BS2,BP1)   | VUS                          |
| X.    | 18 | Heart Failure | DCM  | DSP    | 24  | c.6553C>T  | p.Gln2185*          | Nonsense   | Pathogenic (PVS1,PM2,PP3)     | Not reported                 |

|       |    |              |      |      |    |                        |                    |                     |                                     |              |
|-------|----|--------------|------|------|----|------------------------|--------------------|---------------------|-------------------------------------|--------------|
| XI.   | 19 | Screening    | HNDC | DSP  | 23 | c.3361G>T              | p.Glu1121*         | Nonsense            | Pathogenic (PVS1,PM2,PP3)           | Not reported |
|       |    |              |      | FLNC | 7  | c.1128C>A              | p. Asn376Lys       | Missense            | VUS (PM2,BP1)                       | VUS          |
| XI.   | 20 | Arrhythmic   | HNDC | DSP  | 23 | c.3361G>T              | p.Glu1121*         | Nonsense            | Pathogenic (PVS1,PM2,PP3)           | Not reported |
|       |    |              |      | FLNC | 7  | c.1128C>A              | p. Asn376Lys       | Missense            | VUS (PM2,BP1)                       | VUS          |
| XII.  | 21 | Sudden death | N    | FLNC | 48 | c.8034delC             | p.Cys2679fsTer6    | Frameshift          | Pathogenic                          | Not reported |
| XII.  | 22 | Screening    | DCM  | FLNC | 48 | c.8034delC             | p.Cys2679fsTer6    | Frameshift          | Pathogenic                          | Not reported |
| XIII. | 23 | Chest pain   | HNDC | DSP  | 18 | c.2611_2614del<br>GATA | p.Asp871AsnfsTer17 | Frameshift          | Pathogenic (PVS1,PM2,PP3)           | Not reported |
| XIV.  | 24 | Screening    | HNDC | DSP  | 23 | c.3465G>A              | p.Trp1155*         | Nonsense            | Pathogenic (PVS1,PM2,PP3)           | Pathogenic   |
| XV.   | 25 | Screening    | DCM  | DES  | 1  | c.537_554del           | p.Glu179_Leu184del | Inframe<br>Deletion | Likely Pathogenic (PM1,PM2,PM4,PP3) | Not reported |
| XVI.  | 26 | Screening    | DCM  | DSP  | 24 | c.7000C>T              | p.Arg2334*         | Nonsense            | Pathogenic (PVS1,PM2,PP3)           | VUS          |
| XVII. | 27 | Arrhythmic   | HNDC | DSG2 | 13 | c.1912G>A              | p.Gly638Arg        | Missense            | VUS (PM2,PP3,BP1)                   | VUS          |
| XVII. | 28 | Screening    | DCM  | DSG2 | 13 | c.1912G>A              | p.Gly638Arg        | Missense            | VUS (PM2,PP3,BP1)                   | VUS          |

|        |    |            |     |      |    |           |              |          |                               |              |
|--------|----|------------|-----|------|----|-----------|--------------|----------|-------------------------------|--------------|
| XVIII. | 29 | Chest pain | DCM | DSP  | 4  | c.448C>T  | p.Arg150*    | Nonsense | Pathogenic (PVS1,PM2,PP3)     | Not reported |
| XIX.   | 30 | Chest pain | N   | DSP  | 24 | c.6850C>T | p.Arg2284*   | Nonsense | Pathogenic (PVS1,PM2,PP3,PP5) | Pathogenic   |
| XX.    | 31 | Arrhythmic | CMP | RYR2 | 40 | c.6289G>A | p.Val2097Met | Missense | VUS (PM1,PM2,PP3)             | Not reported |
| XXI.   | 32 | Arrhythmic | DCM | FLNC | 42 | c.7000G>T | p.Glu2334Ter |          | Pathogenic                    | Not reported |

#VarSome: The Human Genomic Variant Search Engine. Christos Kopanos, Vasilis Tsiolkas, Alexandros Kouris, Charles E. Chapple, Monica Albarca Aguilera, Richard Meyer, and Andreas Massouras. *Oxford*

*Bioinformatics*, bty897, 30 October 2018. doi: <https://doi.org/10.1093/bioinformatics/bty897>
